# Supplementary material for: Halofantrine protects photoreceptors in multiple models of retinal degeneration
Source: Research Square preprint supplement (doi:10.21203/rs.3.rs-9511432/v1), 2026-05-13
Supplement: Supplementary file 1 [file d6574a01cf9de21c7ceecfd0.pdf]

## Supplementary Tables and Figures

**Table S1. Details of small molecule candidates evaluated in this study**

| <b>Well</b> | <b>Pubchem ID</b> | <b>Name</b>                |
|-------------|-------------------|----------------------------|
| A1          | NCGC00091250-04   | Reserpine                  |
| B1          | NCGC00168786-01   | Deserpidine                |
| C1          | NCGC00167569-01   | Mefeserpine                |
| D1          | NCGC00253604-01   | Rescimetol                 |
| E1          | NCGC00179331-02   | NCGC00179331-01            |
| F1          | NCGC00017003-01   | Prestwick-13C05            |
| 3TX8        | NCGC00179590-02   | Syrosingopine              |
| A3          | NCGC00016833-01   | Halofantrine hydrochloride |
| B2          | NCGC00015874-05   | Quinacrine                 |
| C2          | NCGC00165756-01   | BiCAPPA                    |
| D2          | NCGC00014300-01   | 500565-15-1                |
| E2          | NCGC00344515-03   | Piperaquine                |
| G2          | NCGC00167490-01   | Lumefantrine               |
| 3TX6        | NCGC00263128-02   | PD-0220245                 |
| B3          | MLS003876812-01   | Proflavine sulfate Hydrate |
| F2          | NCGC00651732-01   | ROC-325                    |
| H2          | NCGC00110901-01   | MLS000731354               |

**Table S2. Plasma concentrations of Halofantrine**

| <b>Animal ID</b> | <b>Tissue</b> | <b>Treatment</b> | <b>Timepoint</b> | <b>Volume (uL)</b> | <b>Conc (ng/mL)</b> |
|------------------|---------------|------------------|------------------|--------------------|---------------------|
| 33001            | Plasma        | 25uM IVT         | Baseline         | 100                | BQL                 |
| 33002            | Plasma        | 25uM IVT         | Baseline         | 100                | BQL                 |
| 33003            | Plasma        | 25uM IVT         | Baseline         | 100                | BQL                 |
| 33004            | Plasma        | 25uM IVT         | Baseline         | 100                | BQL                 |
| 33005            | Plasma        | 25uM IVT         | Baseline         | 100                | BQL                 |
| 33006            | Plasma        | 25uM IVT         | Baseline         | 100                | BQL                 |
| 33007            | Plasma        | 25uM IVT         | 2h               | 250                | BQL                 |
| 33008            | Plasma        | 25uM IVT         | 2h               | 250                | BQL                 |
| 33009            | Plasma        | 25uM IVT         | 2h               | 250                | BQL                 |
| 33013            | Plasma        | 25uM IVT         | 4h               | 250                | BQL                 |
| 33014            | Plasma        | 25uM IVT         | 4h               | 250                | BQL                 |
| 33015            | Plasma        | 25uM IVT         | 4h               | 250                | BQL                 |
| 33010            | Plasma        | 25uM IVT         | 24h              | 250                | BQL                 |
| 33011            | Plasma        | 25uM IVT         | 24h              | 250                | BQL                 |
| 33012            | Plasma        | 25uM IVT         | 24h              | 250                | BQL                 |
| 33001            | Plasma        | 25uM IVT         | 168h             | 250                | BQL                 |
| 33002            | Plasma        | 25uM IVT         | 168h             | 250                | BQL                 |
| 33003            | Plasma        | 25uM IVT         | 168h             | 250                | BQL                 |
| 33004            | Plasma        | 25uM IVT         | 168h             | 250                | BQL                 |
| 33005            | Plasma        | 25uM IVT         | 168h             | 250                | BQL                 |
| 33006            | Plasma        | 25uM IVT         | 168h             | 250                | BQL                 |
| 33016            | Plasma        | 25uM SCS         | Baseline         | 100                | BQL                 |
| 33017            | Plasma        | 25uM SCS         | Baseline         | 100                | BQL                 |
| 33018            | Plasma        | 25uM SCS         | Baseline         | 100                | BQL                 |
| 33019            | Plasma        | 25uM SCS         | Baseline         | 100                | BQL                 |
| 33020            | Plasma        | 25uM SCS         | Baseline         | 100                | BQL                 |
| 33021            | Plasma        | 25uM SCS         | Baseline         | 100                | BQL                 |
| 33022            | Plasma        | 25uM SCS         | 2h               | 250                | BQL                 |
| 33023            | Plasma        | 25uM SCS         | 2h               | 250                | BQL                 |
| 33024            | Plasma        | 25uM SCS         | 2h               | 250                | BQL                 |
| 33028            | Plasma        | 25uM SCS         | 4h               | 250                | BQL                 |
| 33029            | Plasma        | 25uM SCS         | 4h               | 250                | BQL                 |
| 33030            | Plasma        | 25uM SCS         | 4h               | 250                | BQL                 |
| 33025            | Plasma        | 25uM SCS         | 24h              | 250                | BQL                 |
| 33026            | Plasma        | 25uM SCS         | 24h              | 250                | BQL                 |
| 33027            | Plasma        | 25uM SCS         | 24h              | 250                | BQL                 |

|       |        |           |          |     |     |
|-------|--------|-----------|----------|-----|-----|
| 33016 | Plasma | 25uM SCS  | 168h     | 250 | BQL |
| 33017 | Plasma | 25uM SCS  | 168h     | 250 | BQL |
| 33018 | Plasma | 25uM SCS  | 168h     | 250 | BQL |
| 33019 | Plasma | 25uM SCS  | 168h     | 250 | BQL |
| 33020 | Plasma | 25uM SCS  | 168h     | 250 | BQL |
| 33021 | Plasma | 25uM SCS  | 168h     | 250 | BQL |
| 33031 | Plasma | 25uM SubC | Baseline | 100 | BQL |
| 33032 | Plasma | 25uM SubC | Baseline | 100 | BQL |
| 33033 | Plasma | 25uM SubC | Baseline | 100 | BQL |
| 33034 | Plasma | 25uM SubC | Baseline | 100 | BQL |
| 33035 | Plasma | 25uM SubC | Baseline | 100 | BQL |
| 33036 | Plasma | 25uM SubC | Baseline | 100 | BQL |
| 33037 | Plasma | 25uM SubC | 2h       | 250 | BQL |
| 33038 | Plasma | 25uM SubC | 2h       | 250 | BQL |
| 33039 | Plasma | 25uM SubC | 2h       | 250 | BQL |
| 33043 | Plasma | 25uM SubC | 4h       | 250 | BQL |
| 33044 | Plasma | 25uM SubC | 4h       | 250 | BQL |
| 33045 | Plasma | 25uM SubC | 4h       | 250 | BQL |
| 33040 | Plasma | 25uM SubC | 24h      | 250 | BQL |
| 33041 | Plasma | 25uM SubC | 24h      | 250 | BQL |
| 33042 | Plasma | 25uM SubC | 24h      | 250 | BQL |
| 33031 | Plasma | 25uM SubC | 168h     | 250 | BQL |
| 33032 | Plasma | 25uM SubC | 168h     | 250 | BQL |
| 33033 | Plasma | 25uM SubC | 168h     | 250 | BQL |
| 33034 | Plasma | 25uM SubC | 168h     | 250 | BQL |
| 33035 | Plasma | 25uM SubC | 168h     | 250 | BQL |
| 33036 | Plasma | 25uM SubC | 168h     | 250 | BQL |

## Supplemental Figures

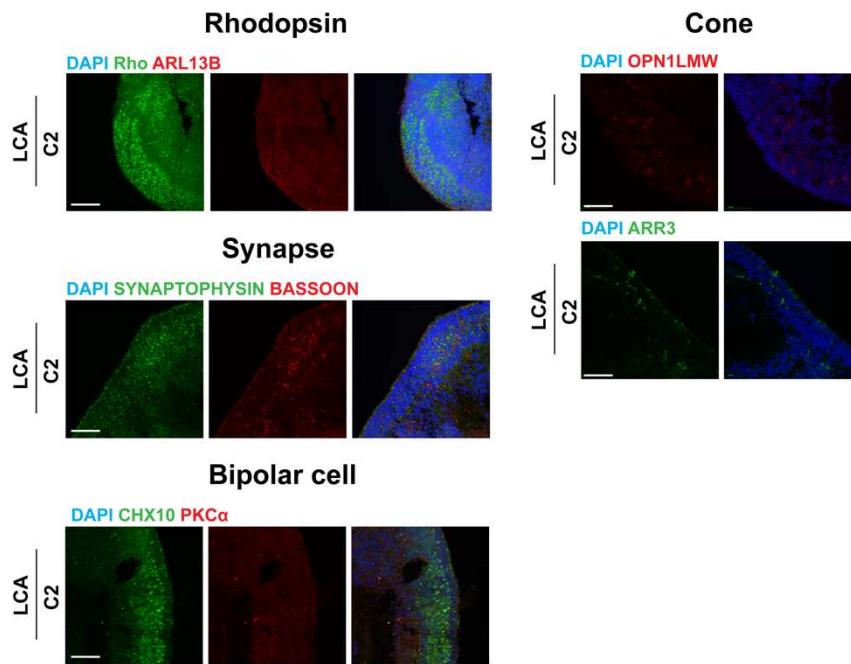

**Figure S1. Various cell types in *CEP290*-LCA retinal organoids treated with compound C2**

Immunostaining of various cell types including rod (Rhodopsin, green), cilia (ARL13B, red), ribbon synapses (BASSOON, red), presynaptic vesicles (SYNAPTOPHYSIN, green), bipolar cells (CHX10, green; PKC $\alpha$ , red), L/M cones (OPN1LMW, red), cone photoreceptors (ARR3, green). Nuclei were stained with 4',6-diamidino-2-phenylindole (DAPI). Images are representative of at least three independent experiments, each of which had at least four organoids. The scale bar represents 50  $\mu$ m.

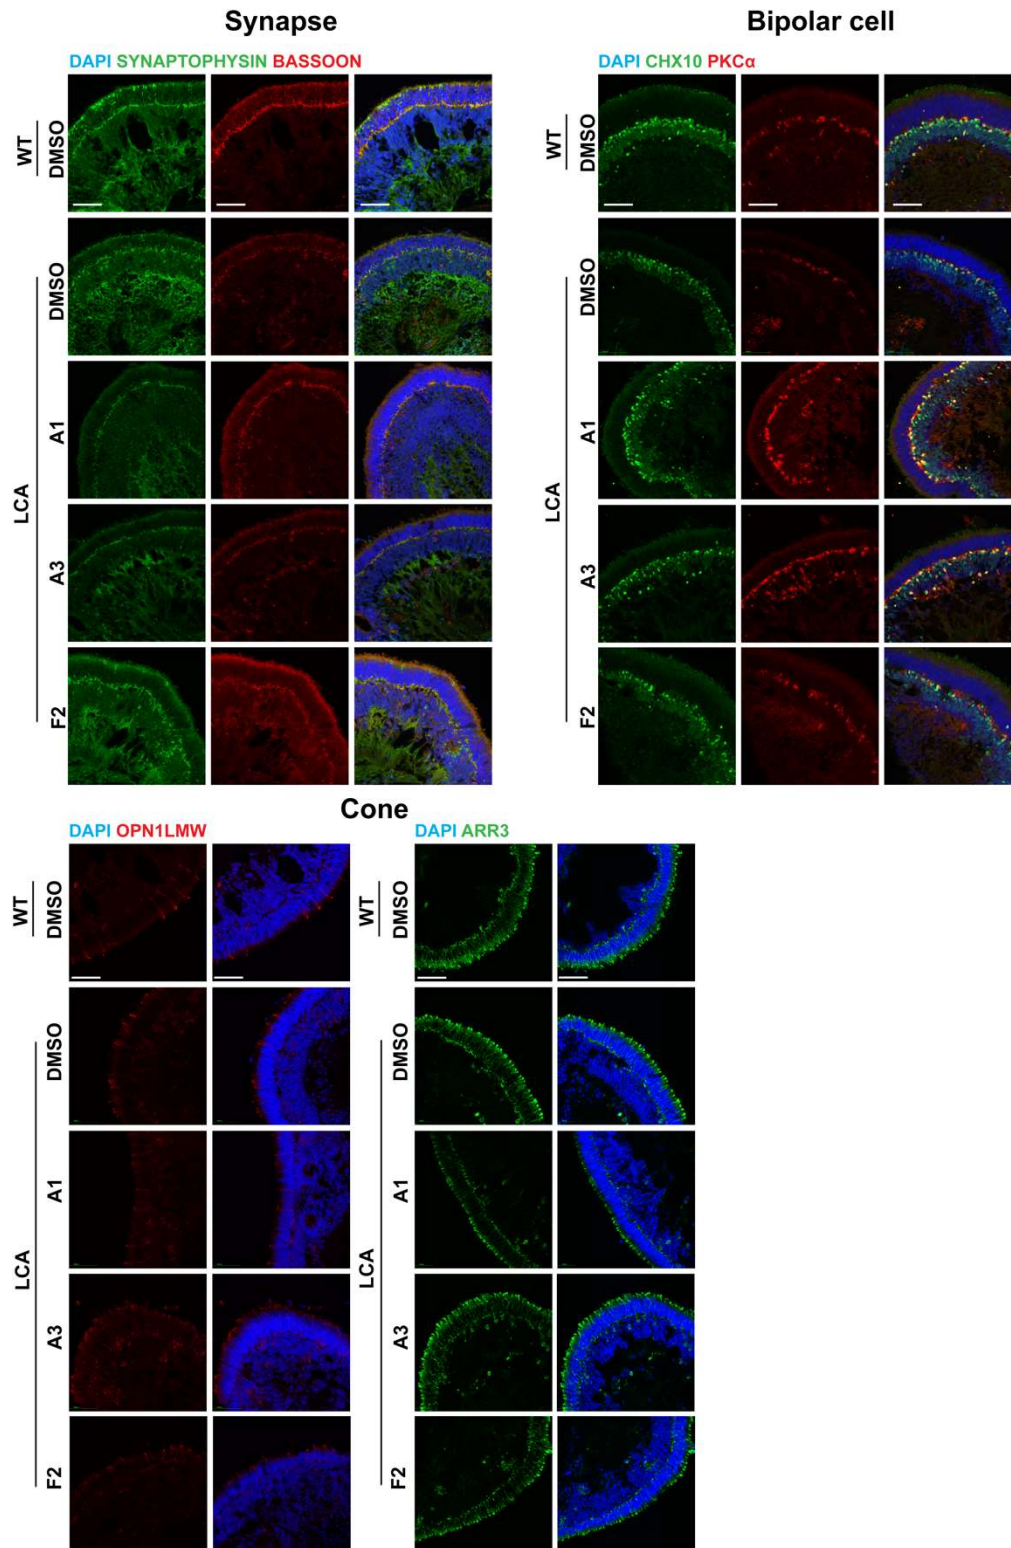

**Figure S2. Various cell types in WT and *CEP290*-LCA retinal organoids treated with individual compounds**

Immunostaining of structural or cell type-specific markers including ribbon synapses (BASSOON, red), presynaptic vesicles (SYNAPTOPHYSIN, green), bipolar cells (CHX10, green; PKC $\alpha$ , red), L/M cones (OPN1LMW, red), cone photoreceptors (ARR3, green). Nuclei were stained with 4',6-diamidino-2-phenylindole (DAPI). Images are representative of at least three independent experiments, each of which had at least four organoids. The scale bar represents 50  $\mu$ m.

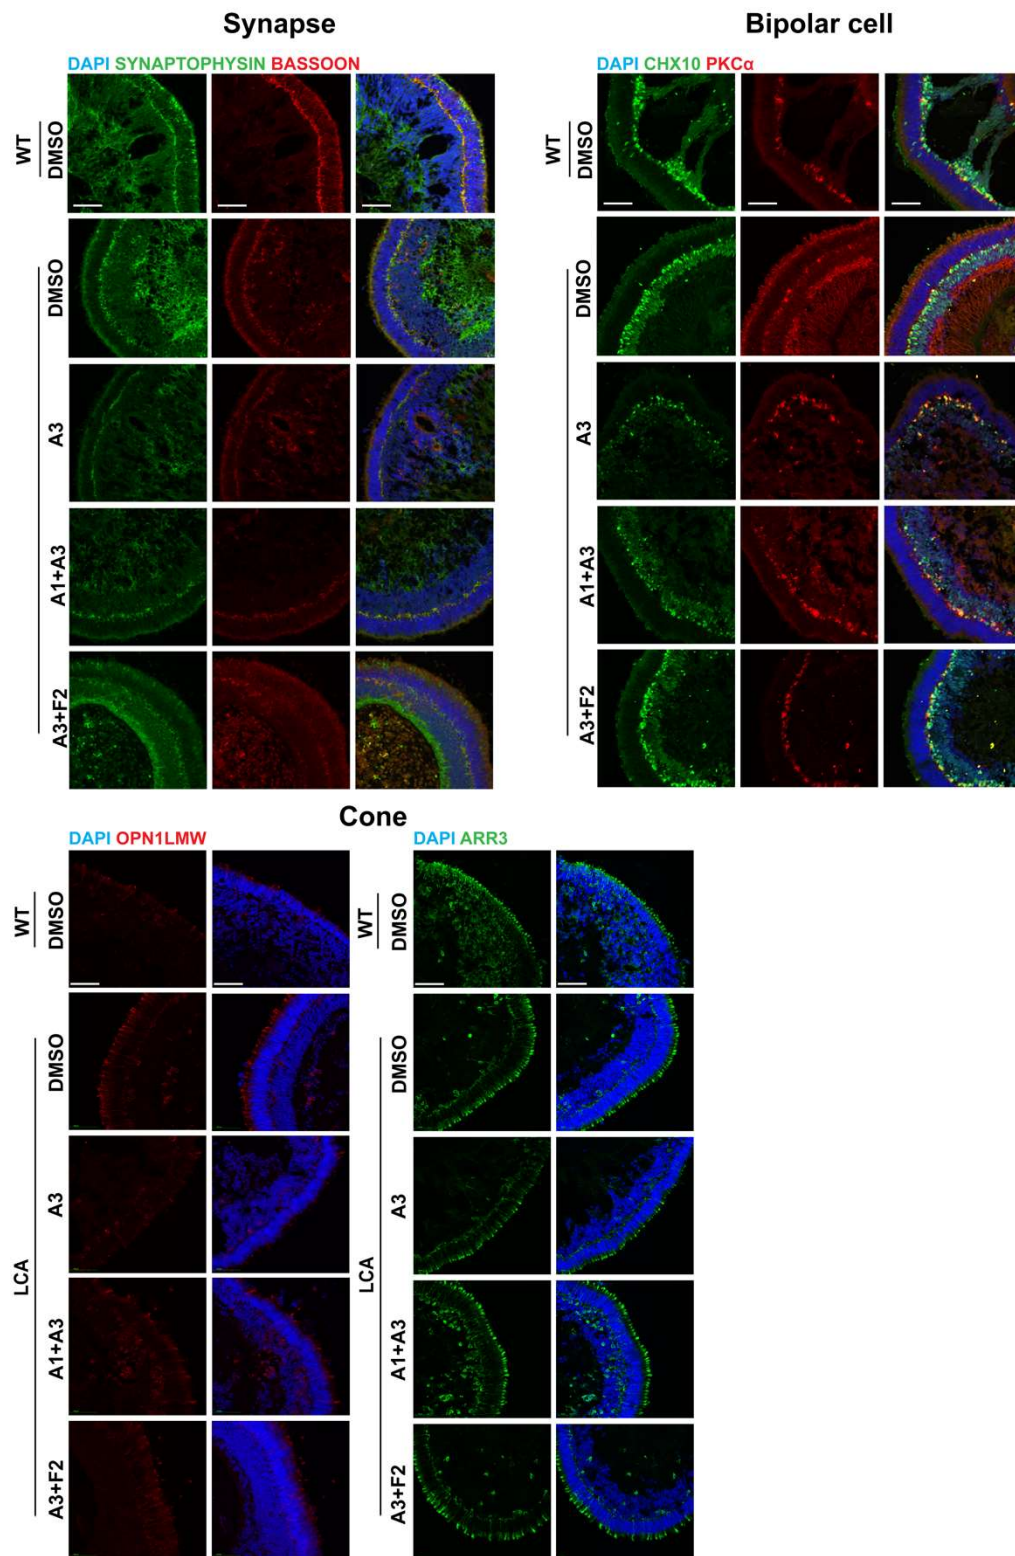

**Figure S3. Various cell types in WT and *CEP290*-LCA retinal organoids treated with compound A3 and combinations with other compounds**

Immunostaining of structural or cell type-specific markers including ribbon synapses (BASSOON, red), presynaptic vesicles (SYNAPTOPHYSIN, green), bipolar cells (CHX10, green; PKC $\alpha$ , red), L/M cones (OPN1LMW, red), cone photoreceptors (ARR3, green). Nuclei were stained with 4',6-diamidino-2-phenylindole (DAPI). Images are representative of at least three independent experiments, each of which had at least four organoids. The scale bar represents 50  $\mu$ m.

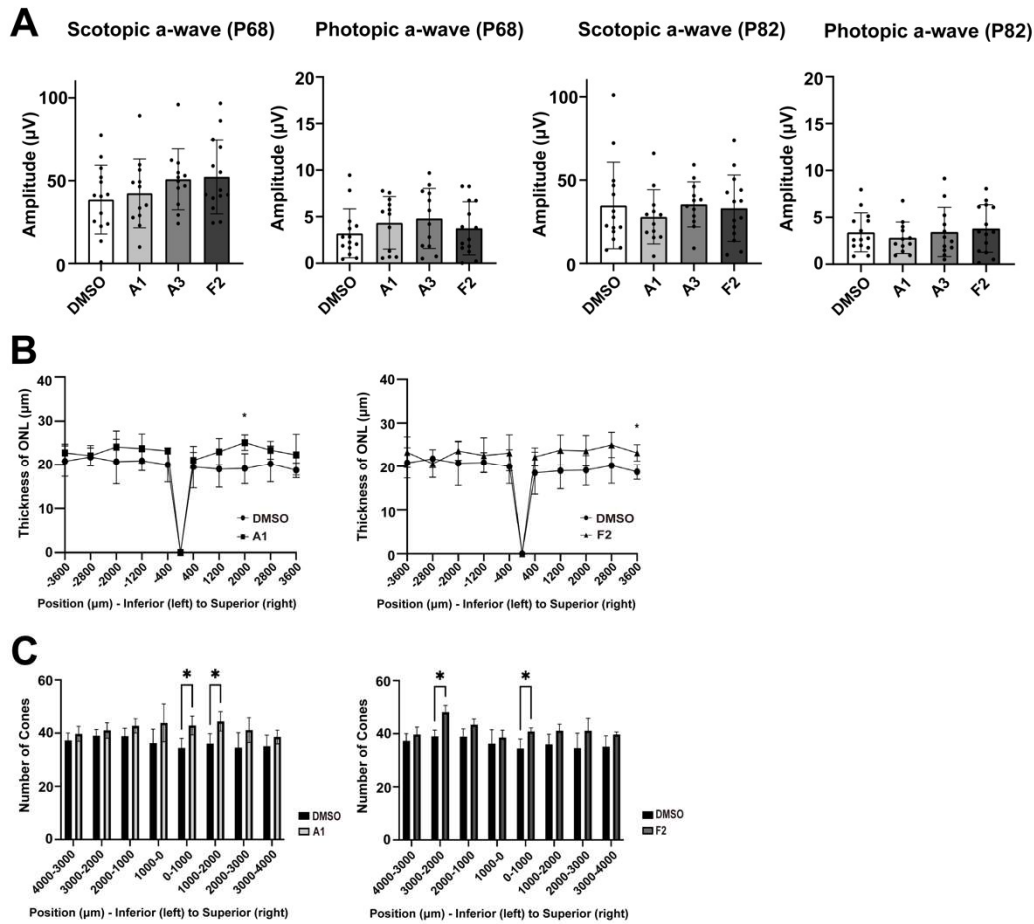

**Figure S4. Functional and structural evaluation of potent candidates in P23H rats**

(A) Scotopic and photopic b-wave ERG responses at P68 and P82 in DMSO- and compound-treated P23H rats. Data are presented as mean  $\pm$  SEM, and the Brown-Forsythe and Welch ANOVA tests were used to compare 7 DMSO- and 6 or 7 compound-treated rats. (B) Analysis of ONL thickness using DAPI-stained retinal sections at P84. (C) The numbers of cone photoreceptors was counted every 1000  $\mu\text{m}$  throughout the retina. Data are presented as mean  $\pm$  SEM, using Mann-Whitney U test. \*P < 0.05

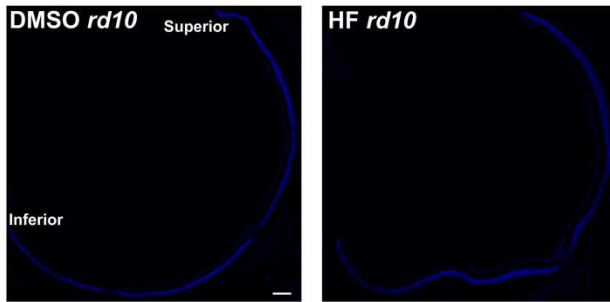

**Figure S5. Representative images of whole retinal sections from DMSO- and Halofantrine (HF)-treated *rd10* mice**

Representative whole-retina sections stained with DAPI at P36. The scale bar represents 100  $\mu\text{m}$ . HF, Halofantrine.

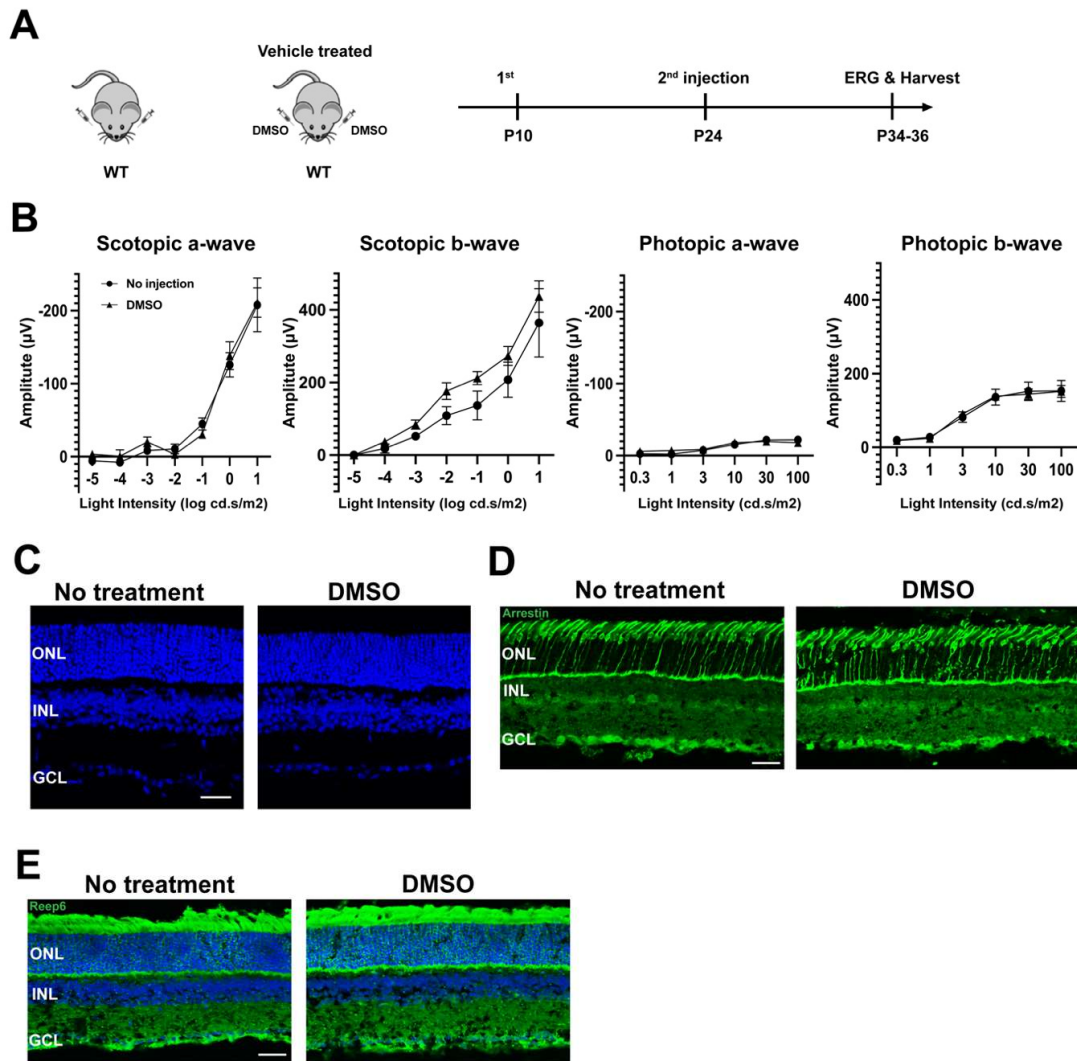

**Figure S6. Effect of DMSO in WT mice**

(A) Timeline of in vivo intravitreal injections for quantification of outer nuclear layer thickness (ONL), retinal morphology, and immunohistochemistry studies. (B) Scotopic and photopic electroretinogram responses in untreated and DMSO-treated WT mice. (C) Outer nuclear layer thickness evaluated in DAPI-stained retinal sections at P36. The representative images were taken from the superior retina, 1800 µm away from the optic nerve. Data are presented as mean ± SEM, and the Mann-Whitney U test was used to compare untreated and DMSO-treated groups. Images are representative of eight mice. (D) Cone photoreceptors were evaluated by immunostaining of cone arrestin at P36. The number of cone photoreceptors was counted every 500 µm throughout the retina. Data are presented as mean ± SEM, and the Mann-Whitney U test was used to compare untreated and DMSO-treated groups. (E) Rod photoreceptors were evaluated by immunostaining for REEP6 (green) at P36. Representative images were obtained from retinal regions where the most significant changes were observed. The scale bar represents 20 µm.

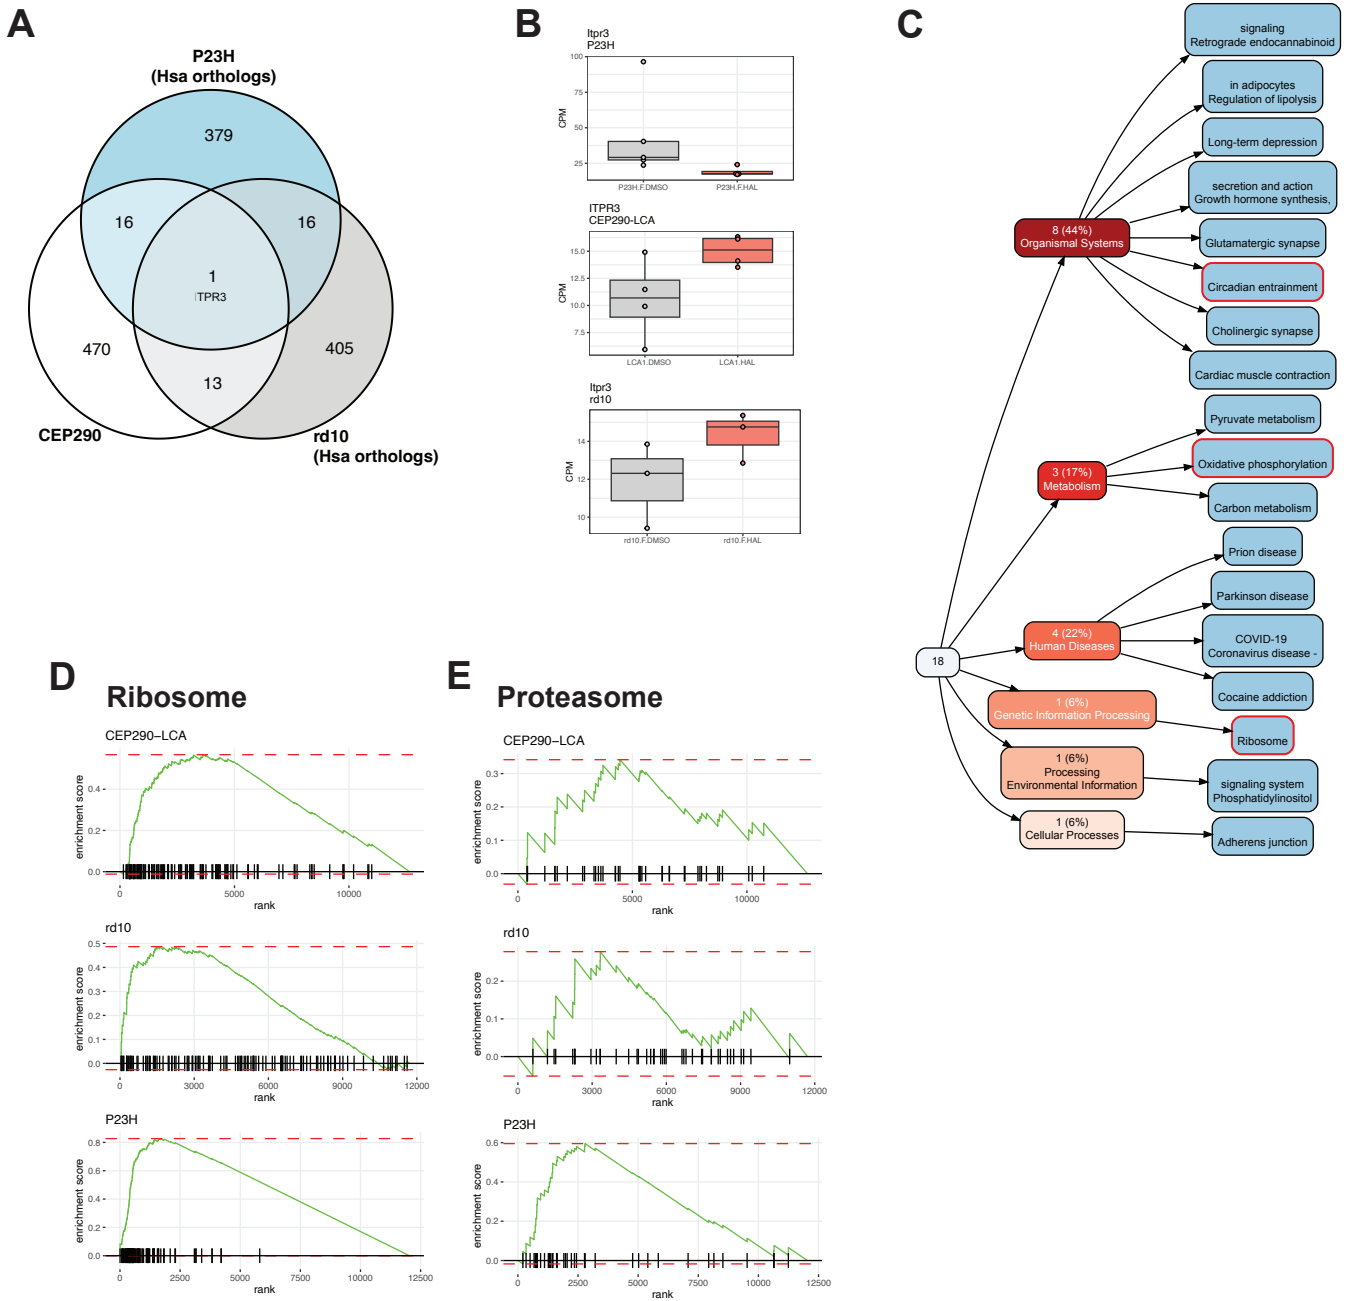

**Figure S7. Functional analysis of halofantrine treatment in retinal disease models.**

(A) Venn diagram showing intersections in halofantrine linked DEGs in the various IRD models. P23H and rd10 DEGs were converted to corresponding human aliases for comparison. (B) Boxplot of *Itp3* expression in treated and untreated IRD models. (C) List of halofantrine responding KEGG pathways shared between two or more disease models. (D,E) Enrichment plot of Ribosome and Proteasome genesets after drug treatment.

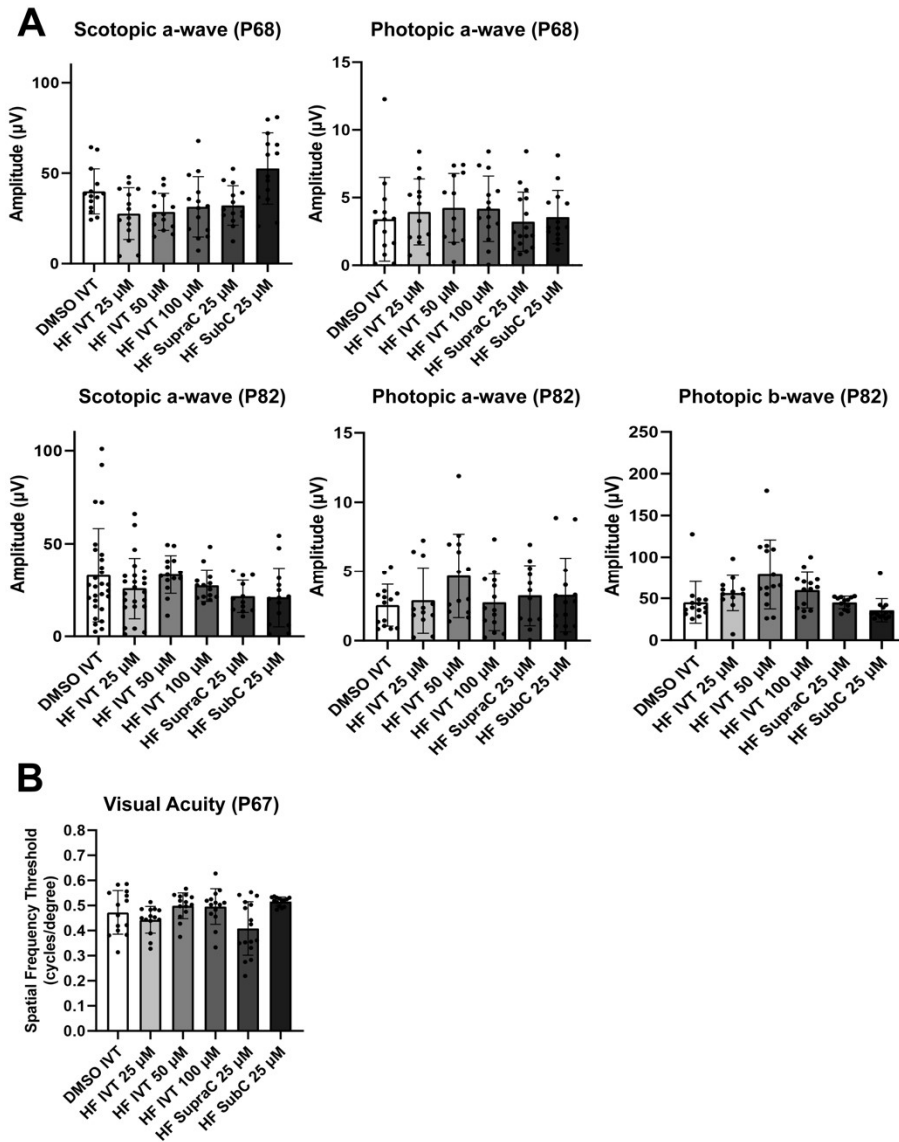

**Figure S8. ERG and OKT responses in halofantrine-treated P23H rats**

(A,B) Functional ERG and OKT outcomes following halofantrine administration via various ocular routes and dosages in P23H rats ( $n=7$  per group). Data are presented as mean  $\pm$  SEM, and the Brown-Forsythe and Welch ANOVA tests were used to compare the groups.

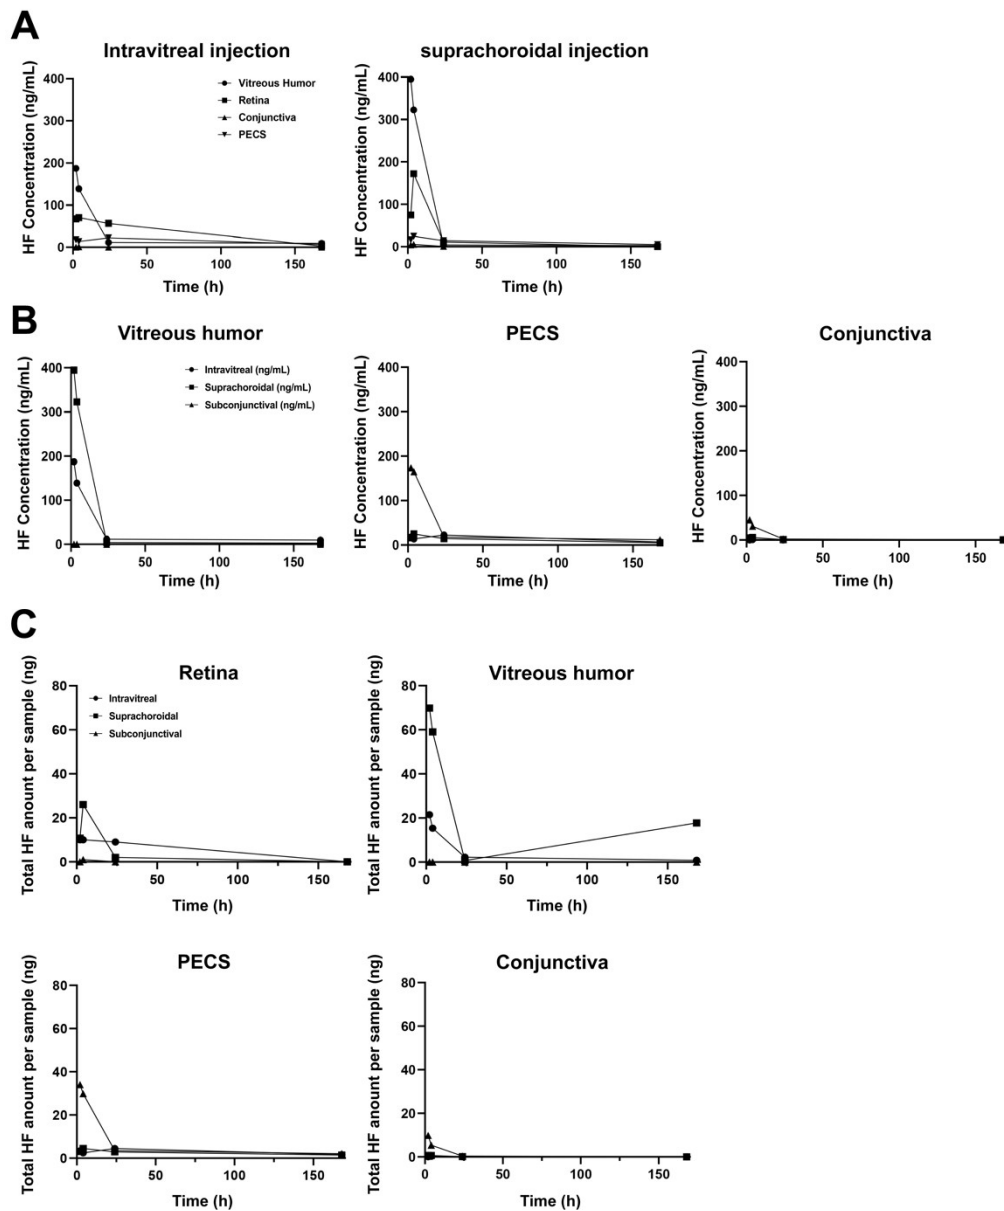

**Figure S9. Ocular pharmacokinetics and tissue distribution of halofantrine**

(A) Comparison of halofantrine distribution across various ocular tissues following intravitreal and suprachoroidal administration. (B) Pharmacokinetics and ocular tissue distribution of halofantrine following different delivery routes in WT rats. (C) Absolute amounts of halofantrine (ng) detected in individual ocular tissues after administration via three different injection routes (62.5 ng per eye).
